# Supplementary material for: The clinical course of schizophrenia in women and men—a nation-wide cohort study
Source: PubMed Central journal article supplement (PMC7195359; doi:10.1038/s41537-020-0102-z), 2020-05-01
Supplement: 41537_2020_102_MOESM1_ESM.pdf [file 41537_2020_102_MOESM1_ESM.pdf]

**Supplementary material**

| Medication category           | ATC index                                                                                                     |
|-------------------------------|---------------------------------------------------------------------------------------------------------------|
| Antipsychotics                | N05A                                                                                                          |
| Antidepressants               | N06A                                                                                                          |
| SSRIs                         | N06AB                                                                                                         |
| Other antidepressants         | N06AA, N06AG02, N06AX                                                                                         |
| Mood stabilizers              | N03AF01, N03AG01, N03AX09, N05AN01                                                                            |
| Benzodiazepines               | N05BA, N05CD, N05CF                                                                                           |
| Zopiclone and zolpidem        | N05CF01, N05CF02                                                                                              |
| ADHD medication               | N06AB                                                                                                         |
| Clozapine                     | N05AH02                                                                                                       |
| Olanzapine                    | N05AH03                                                                                                       |
| Quetiapine                    | N05AH04                                                                                                       |
| Risperidone                   | N05AX08                                                                                                       |
| Aripiprazole                  | N05AX12                                                                                                       |
| Any long acting antipsychotic | LAI formulations of N05AB02, N05AB03, N05AC04D, N05AD01, N05AF01, N05AF05, N05AH03, N05AX08, N05AX12, N05AX13 |

Table 1: Medication categories used with ATC indices.

| Diagnostic category                                 | ICD 10                  | ICD 9                                                                                                                                                                                              |
|-----------------------------------------------------|-------------------------|----------------------------------------------------------------------------------------------------------------------------------------------------------------------------------------------------|
| Substance-use related disorders                     | F10-F19, F55            | 291, 292, 303, 304, 305                                                                                                                                                                            |
| Other psychotic disorders                           | F21, F22, F23, F28, F29 | 297, 298                                                                                                                                                                                           |
| Mood disorders with mania                           | F30, F31, F34.0         | 2962-2964, 2967, 3011D                                                                                                                                                                             |
| Mood disorders without mania                        | F32-F39, excl. F34.0    | 2961                                                                                                                                                                                               |
| Phobias and anxiety disorders                       | F40-F41                 | 3000, 3002, 3003                                                                                                                                                                                   |
| OCD                                                 | F42                     | 3003A                                                                                                                                                                                              |
| PTSD                                                | F43.1                   | 3098X                                                                                                                                                                                              |
| Dissociative, somatoform and neurasthenic disorders | F44, F45, F48           | 3078, 3006A, 3008A, 3009X, 3001                                                                                                                                                                    |
| Personality disorders                               | F60-F69                 | 3010A, 3012A, 3017A, 3018D, 3015A, 3014A, 3018C, 3016A, 3018X, 3123A, 3123B, 3123C, 3120A, 3123X, 3025A, 3026A, 3029X, 3028B, 3024A, 3028C, 3022A, 3028D, 3029X, 3026A, 3020A, 3028X, 3015B, 3120A |
| Eating disorders                                    | F50                     | 3071A, 3075B, 3075E, 3075A                                                                                                                                                                         |
| Sleeping disorders                                  | F51                     | 3074                                                                                                                                                                                               |
| Mental retardation                                  | F70-F79                 | 317-319                                                                                                                                                                                            |
| Developmental disorders autism spectrum             | F80-F89                 | 2990A, 2998A, 3150-3155, 3159                                                                                                                                                                      |
| Developmental disorders ADHD spectrum               | F90-98                  | 314, 3120A, 3092A, 3138A, 3138X, 3133A, 3132C, 3072B, 3072C, 3072A, 3076A, 3077A, 3075A, 3075C, 3073A, 3070B, 3079X                                                                                |
| Suicide/ self-harm                                  | X60-X84, Y10-Y34        | E950A, E954A, E955A, E956A, E957A, E959A, E959X, E970A, E972A, E973A, E974A, E979A                                                                                                                 |

Table 2: diagnostic categories used and corresponding codes for ICD 9 and 10.

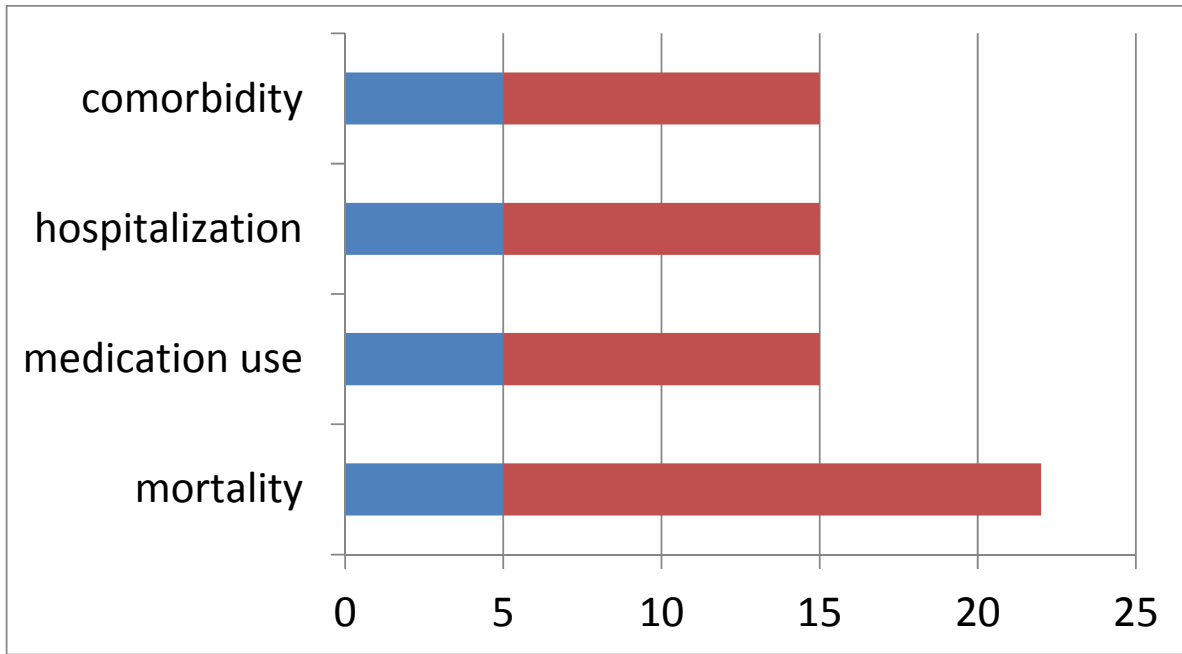

Supplementary Figure 1. Study design and outcomes of interest before and after schizophrenia-spectrum diagnosis.

Time axis in years. Assessment time before first hospitalization for schizophrenia or schizoaffective disorder in blue, assessment time after that diagnosis in red. Medication use was recorded 5 years before and five years after diagnosis. Hospitalization was recorded five years before and up to ten years after diagnosis. Mortality was only recorded after diagnosis with a follow-up period of up to 17 years.

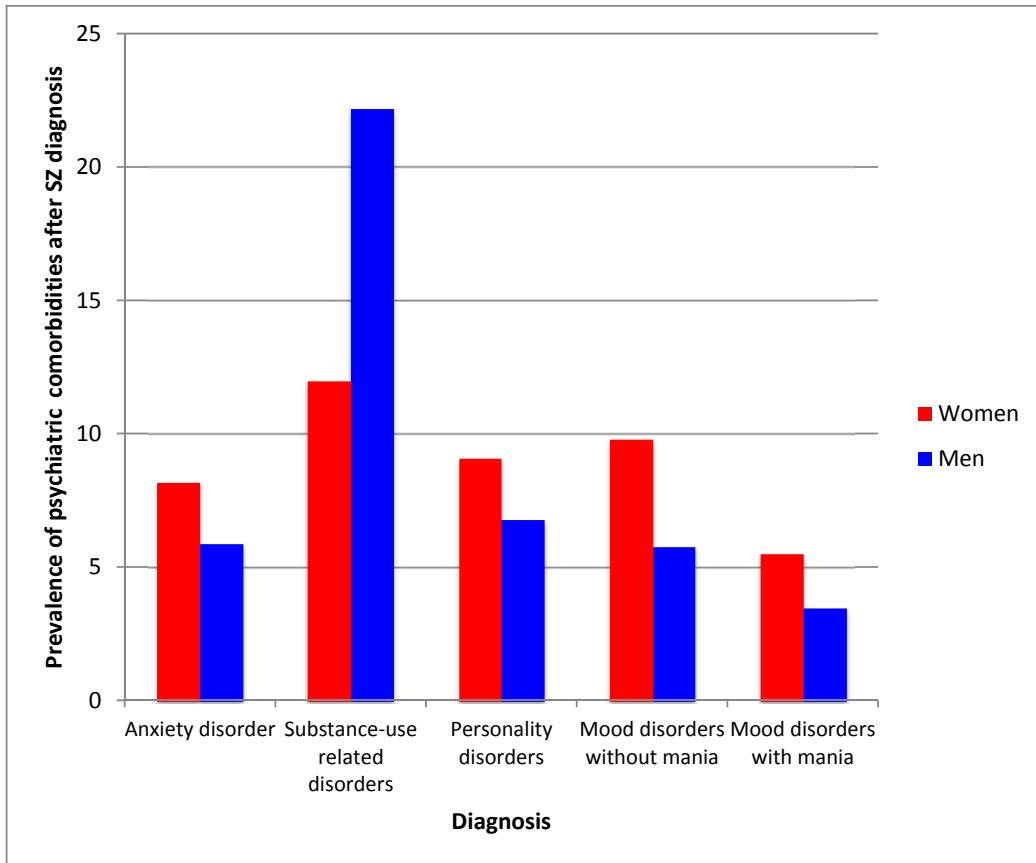

Supplementary Figure 2. Prevalence of psychiatric comorbidities after the schizophrenia-spectrum (SZ) diagnosis categorized by gender (men = 9006, women = 7142).

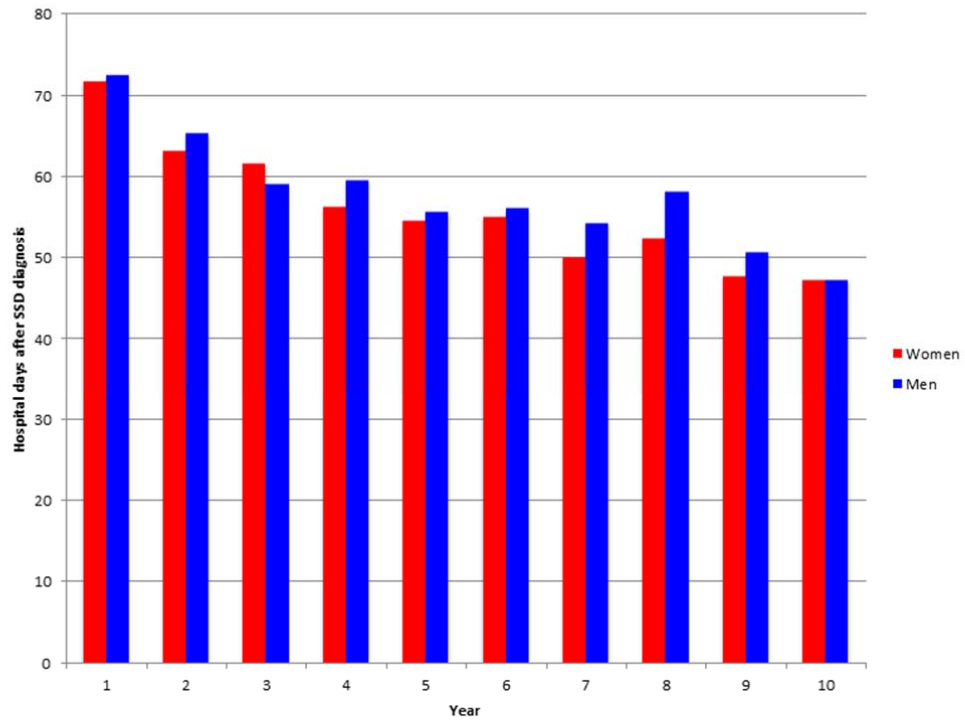

Supplementary Figure 3. Mean number of hospital days for any psychiatric disorder after the diagnosis of schizophrenia-spectrum disease for those who had hospital care days each year (at first year, for 2974 women and 3767 men).
