# Supplementary material for: The clinical course of schizophrenia in women and men—a nation-wide cohort study
Source: PubMed Central journal article supplement (PMC7195359; doi:10.1038/s41537-020-0102-z), 2020-05-01
Supplement: 41537_2020_102_MOESM2_ESM.pdf [file 41537_2020_102_MOESM2_ESM.pdf]

## Reporting Summary

Nature Research wishes to improve the reproducibility of the work that we publish. This form provides structure for consistency and transparency in reporting. For further information on Nature Research policies, see [Authors & Referees](#) and the [Editorial Policy Checklist](#).

### Statistical parameters

When statistical analyses are reported, confirm that the following items are present in the relevant location (e.g. figure legend, table legend, main text, or Methods section).

n/a Confirmed

- The exact sample size ( $n$ ) for each experimental group/condition, given as a discrete number and unit of measurement
- An indication of whether measurements were taken from distinct samples or whether the same sample was measured repeatedly
- The statistical test(s) used AND whether they are one- or two-sided  
*Only common tests should be described solely by name; describe more complex techniques in the Methods section.*
- A description of all covariates tested
- A description of any assumptions or corrections, such as tests of normality and adjustment for multiple comparisons
- A full description of the statistics including central tendency (e.g. means) or other basic estimates (e.g. regression coefficient) AND variation (e.g. standard deviation) or associated estimates of uncertainty (e.g. confidence intervals)
- For null hypothesis testing, the test statistic (e.g.  $F$ ,  $t$ ,  $r$ ) with confidence intervals, effect sizes, degrees of freedom and  $P$  value noted  
*Give  $P$  values as exact values whenever suitable.*
- For Bayesian analysis, information on the choice of priors and Markov chain Monte Carlo settings
- For hierarchical and complex designs, identification of the appropriate level for tests and full reporting of outcomes
- Estimates of effect sizes (e.g. Cohen's  $d$ , Pearson's  $r$ ), indicating how they were calculated
- Clearly defined error bars  
*State explicitly what error bars represent (e.g. SD, SE, CI)*

*Our web collection on [statistics for biologists](#) may be useful.*

### Software and code

Policy information about [availability of computer code](#)

Data collection

The base cohort included all persons hospitalized for a schizophrenia-spectrum disorder (SSD) between 1972 and 2014 in Finland.11

Data analysis

For manuscripts utilizing custom algorithms or software that are central to the research but not yet described in published literature, software must be made available to editors/reviewers upon request. We strongly encourage code deposition in a community repository (e.g. GitHub). See the Nature Research [guidelines for submitting code & software](#) for further information.

### Data

Policy information about [availability of data](#)

All manuscripts must include a [data availability statement](#). This statement should provide the following information, where applicable:

- Accession codes, unique identifiers, or web links for publicly available datasets
- A list of figures that have associated raw data
- A description of any restrictions on data availability

## Field-specific reporting

Please select the best fit for your research. If you are not sure, read the appropriate sections before making your selection.

Life sciences  Behavioural & social sciences

For a reference copy of the document with all sections, see [nature.com/authors/policies/ReportingSummary-flat.pdf](https://www.nature.com/authors/policies/ReportingSummary-flat.pdf)

## Life sciences

### Study design

All studies must disclose on these points even when the disclosure is negative.

|                 |                                                                                                                                                                            |
|-----------------|----------------------------------------------------------------------------------------------------------------------------------------------------------------------------|
| Sample size     | <input type="text" value="complete Finish population"/>                                                                                                                    |
| Data exclusions | <input type="text" value="The year 2000 was chosen to ensure follow-up time of at least five years for medication use before the diagnoses of SSD, since the National"/> + |
| Replication     | <input type="text"/>                                                                                                                                                       |
| Randomization   | <input type="text"/>                                                                                                                                                       |
| Blinding        | <input type="text"/>                                                                                                                                                       |

### Materials & experimental systems

Policy information about [availability of materials](#)

|                                     |                                                                 |
|-------------------------------------|-----------------------------------------------------------------|
| n/a                                 | Involvement in the study                                        |
| <input checked="" type="checkbox"/> | <input type="checkbox"/> Unique materials                       |
| <input checked="" type="checkbox"/> | <input type="checkbox"/> Antibodies                             |
| <input checked="" type="checkbox"/> | <input type="checkbox"/> Eukaryotic cell lines                  |
| <input checked="" type="checkbox"/> | <input type="checkbox"/> Research animals                       |
| <input type="checkbox"/>            | <input checked="" type="checkbox"/> Human research participants |

#### Unique materials

|                            |                                                                                                                                                                  |
|----------------------------|------------------------------------------------------------------------------------------------------------------------------------------------------------------|
| Obtaining unique materials | <input type="text" value="Describe any restrictions on the availability of unique materials OR confirm that all unique materials used are readily available"/> + |
|----------------------------|------------------------------------------------------------------------------------------------------------------------------------------------------------------|

#### Antibodies

|                 |                        |
|-----------------|------------------------|
| Antibodies used | <input type="text"/>   |
| Validation      | <input type="text"/> + |

#### Eukaryotic cell lines

Policy information about [cell lines](#)

|                                                                      |                        |
|----------------------------------------------------------------------|------------------------|
| Cell line source(s)                                                  | <input type="text"/>   |
| Authentication                                                       | <input type="text"/>   |
| Mycoplasma contamination                                             | <input type="text"/> + |
| Commonly misidentified lines<br>(See <a href="#">ICLAC</a> register) | <input type="text"/>   |

#### Research animals

Policy information about [studies involving animals](#); [ARRIVE guidelines](#) recommended for reporting animal research

|                                  |                        |
|----------------------------------|------------------------|
| Animals/animal-derived materials | <input type="text"/> + |
|----------------------------------|------------------------|

## Human research participants

Policy information about [studies involving human research participants](#)Population characteristics  +

## Method-specific reporting

n/a  Involved in the study

ChIP-seq

Flow cytometry

Magnetic resonance imaging

## ChIP-seq

## Data deposition

- Confirm that both raw and final processed data have been deposited in a public database such as [GEO](#).
- Confirm that you have deposited or provided access to graph files (e.g. BED files) for the called peaks.

Data access links   
*May remain private before publication.*

Files in database submission

Genome browser session (e.g. [UCSC](#))  +

## Methodology

Replicates

Sequencing depth  +

Antibodies  +

Peak calling parameters  +

Data quality  +

Software  +

## Flow Cytometry

## Plots

Confirm that:

- The axis labels state the marker and fluorochrome used (e.g. CD4-FITC).
- The axis scales are clearly visible. Include numbers along axes only for bottom left plot of group (a 'group' is an analysis of identical markers).
- All plots are contour plots with outliers or pseudocolor plots.
- A numerical value for number of cells or percentage (with statistics) is provided.

## Methodology

Sample preparation

Instrument

Software  +

Cell population abundance  +

Gating strategy  +

- Tick this box to confirm that a figure exemplifying the gating strategy is provided in the Supplementary Information.

## Magnetic resonance imaging

### Experimental design

Design type

Design specifications

Behavioral performance measures

### Acquisition

Imaging type(s)

Field strength

Sequence & imaging parameters

Area of acquisition

Diffusion MRI  Used  Not used

### Preprocessing

Preprocessing software

Normalization

Normalization template

Noise and artifact removal

Volume censoring

### Statistical modeling & inference

Model type and settings

Effect(s) tested

Specify type of analysis:  Whole brain  ROI-based  Both

Statistic type for inference  
(See [Eklund et al. 2016](#))

Correction

### Models & analysis

n/a | Involved in the study

Functional and/or effective connectivity

Graph analysis

Multivariate modeling or predictive analysis

Functional and/or effective connectivity

Graph analysis

Multivariate modeling and predictive analysis

## Behavioural & social sciences

### Study design

All studies must disclose on these points even when the disclosure is negative.

Study description

|                   |                                                                                                                                                                                                                        |
|-------------------|------------------------------------------------------------------------------------------------------------------------------------------------------------------------------------------------------------------------|
| Research sample   | Finish population                                                                                                                                                                                                      |
| Sampling strategy | all citizen                                                                                                                                                                                                            |
| Data collection   | Finish birth registry                                                                                                                                                                                                  |
| Timing            | The year 2000 was chosen to ensure follow-up time of at least five years for medication use before the diagnoses of SSD, since the  |
| Data exclusions   |                                                                                                                                                                                                                        |
| Non-participation |                                                                                                                                                                                                                        |
| Randomization     |                                                                                                                                                                                                                        |
